# Supplementary material for: Healthcare Students and Medical Residents as Second Victims: A Cross-Sectional Study
Source: MDPI journal article supplement (doi:10.3390/ijerph191912218), 2022-09-26
Supplement: s1 [file s1]

**Supplementary Materials S1 to "Health Care students as second victims: a cross sectional study" (Rinaldi et al.) - Complete Questionnaire**

| Code | Question                                                                                                                                                                                                              | Possible Answers (if closed)                                                                                                                                                                            |
|------|-----------------------------------------------------------------------------------------------------------------------------------------------------------------------------------------------------------------------|---------------------------------------------------------------------------------------------------------------------------------------------------------------------------------------------------------|
| Q1   | Start Time                                                                                                                                                                                                            |                                                                                                                                                                                                         |
| Q2   | End Time                                                                                                                                                                                                              |                                                                                                                                                                                                         |
| Q3   | 1.Età (Age)                                                                                                                                                                                                           |                                                                                                                                                                                                         |
| Q4   | 2.Genere (Gender)                                                                                                                                                                                                     | M / F                                                                                                                                                                                                   |
| Q5   | 3.Mesi di tirocinio (Months of training)                                                                                                                                                                              |                                                                                                                                                                                                         |
| Q6   | Tirocinio aggiustato (Adjusted training months)                                                                                                                                                                       |                                                                                                                                                                                                         |
| Q7   | 4.Anno accademico di immatricolazione (academic year of enrolment)                                                                                                                                                    |                                                                                                                                                                                                         |
| Q8   | 5.Corso di studio<br>(Typology of study course, with detail of residency programs)                                                                                                                                    | Infermieristica=1;M&Cmcu=2;SpecAnest&Rian=3;SpecIgi&Prev=4;SpecMeu=5;SpecMFR=6;SpecOrtop=7;SpecPedia=8;SpecGine=9;SpecRadio=10;SpecMI=11;SpecCardio=12;SPecPsic=13;SPecNeuro=14;SpecChir=15;SpecOtor=16 |
| Q9   | 5.Corso di studio<br>(Typology of study course, residency programs as aggregate category)                                                                                                                             | Infermieristica/Nurse=1;M&C/Medicine=2;Spec/Resident=3                                                                                                                                                  |
| Q10  | 6.Hai mai avuto esperienza o sei mai stato testimone di un PSI che ha avuto conseguenze su uno o più pazienti?<br>(Have you ever experienced a PSI with consequences on one or more patients?)                        | 1=No,non sono mai stato coinvolto; 2=Sì,dall'esterno; 3=Sì,ho effettuato io la manovra; 4=sì, ho partecipato alla manovra                                                                               |
| Q11  | 7.Che impatto ha avuto sul paziente il più severo PSI in cui sei stato direttamente coinvolto?<br>(How severe was the impact of the PSI you were involved in on the patient?)                                         | 0=nessuna lesione;1=lesione temporanea; 2=lesione permanente; 3=morte del paziente                                                                                                                      |
| Q12  | 8.In quanti PSI sei stato coinvolto negli ultimi 6 mesi?<br>(How many PSI have you been involved in during the last 6 months?)                                                                                        |                                                                                                                                                                                                         |
| Q13  | 9.Che impatto ha avuto sul paziente il più severo PSI a cui hai assistito?<br>(What impact the most severe PSI you experienced had on the patient?)                                                                   | 0=nessuna lesione;1=lesione temporanea; 2=lesione permanente; 3=morte del paziente                                                                                                                      |
| Q14  | 10.A quanti PSI hai assistito negli ultimi 6 mesi?<br>(How many PSI have you been involved into during the last 6 months?)                                                                                            |                                                                                                                                                                                                         |
| Q15  | 11.Quando è avvenuto il PSI o, in caso di più PSI, quello più significativo?<br>(When did the PSI or, in case of multiple PSIs, the most significant PSI happen?)                                                     | 1=1 mese fa;2=1-6 mesi fa; 3=6-12 mesi fa; 4=più di 1 anno fa                                                                                                                                           |
| Q16  | 12.In quale setting lavorativo è avvenuto questo PSI?<br>(What was the setting of the PSI?)                                                                                                                           | 1=ospedaliero; 2= casa di riposo; 3= altro(continuità ass)                                                                                                                                              |
| Q17  | 13.Potresti descrivere esattamente cosa è accaduto?<br>(Can you describe in detail what happened?)                                                                                                                    |                                                                                                                                                                                                         |
| Q18  | 14(a). Quale pensi che sia stata la causa di questo PSI?: Distrazione<br>(In your opinion, what was the cause of this PSI? Distraction)                                                                               | 0=niente a che vedere;1=molto a che fare; 2=non so                                                                                                                                                      |
| Q19  | 14(b).Errore di comunicazione (Communication error)                                                                                                                                                                   | 0=niente a che vedere;1=molto a che fare; 2=non so                                                                                                                                                      |
| Q20  | 14(c).Alta pressione lavorativa (High working pressure)                                                                                                                                                               | 0=niente a che vedere;1=molto a che fare; 2=non so                                                                                                                                                      |
| Q21  | 14(d).Esperienza insufficiente (Insufficient/lacking experience)                                                                                                                                                      | 0=niente a che vedere;1=molto a che fare; 2=non so                                                                                                                                                      |
| Q22  | 14(e).Conoscenza insufficiente (Insufficient/lacking Knowledge)                                                                                                                                                       | 0=niente a che vedere;1=molto a che fare; 2=non so                                                                                                                                                      |
| Q23  | 14(f). Supervisione insufficiente (Insufficient/lacking supervision)                                                                                                                                                  | 0=niente a che vedere;1=molto a che fare; 2=non so                                                                                                                                                      |
| Q24  | 14(g).Errore di procedura (Procedure error)                                                                                                                                                                           | 0=niente a che vedere;1=molto a che fare; 2=non so                                                                                                                                                      |
| Q25  | 15.Secondo la tua opinione il PSI si sarebbe potuto evitare?<br>(In your opinion, do you think this PSI could have been avoided?)                                                                                     | 0=evitabile; 1=molto facile da evitare; 2=facile da evitare; 3= difficile da evitare; 4=molto difficile da evitare                                                                                      |
| Q26  | 16.Hai risentito del PSI? (Have the PSI had an impact on your life?)                                                                                                                                                  | 0=Non ha avuto impatto significativo; 1= Impatto vita profess; 2=impatto vita pers; 3= sì, profess e person                                                                                             |
| Q27  | 17(a). Per quanto tempo hai sofferto delle seguenti sensazioni/emozioni negative come conseguenza del PSI? : Paura<br>(How long have you experienced this negative emotion/feeling as a consequence of the PSI? Fear) | 0=mai; 1=poche ore; 2=1gg; 3=<1 settimana; 4=<1mese; 5= 1-6 mesi; 6= 7-12 mesi;7=>1anno                                                                                                                 |

|     |                                                                                                                                                     |                                                                                                            |
|-----|-----------------------------------------------------------------------------------------------------------------------------------------------------|------------------------------------------------------------------------------------------------------------|
| Q28 | <b>17(b).Flashback (Flashback)</b>                                                                                                                  | 0=mai; 1=poche ore; 2=1gg; 3=<1 settimana; 4=<1 mese; 5= 1-6 mesi; 6= 7-12 mesi;7=>1anno                   |
| Q29 | <b>17(c).Ipervigilanza (Hypervigilance)</b>                                                                                                         | 0=mai; 1=poche ore; 2=1gg; 3=<1 settimana; 4=<1 mese; 5= 1-6 mesi; 6= 7-12 mesi;7=>1anno                   |
| Q30 | <b>17(d).Sensazione di lavorare male (Feeling of working badly)</b>                                                                                 | 0=mai; 1=poche ore; 2=1gg; 3=<1 settimana; 4=<1 mese; 5= 1-6 mesi; 6= 7-12 mesi;7=>1anno                   |
| Q31 | <b>17(e).Infelicità e depressione (Unhappiness / depression)</b>                                                                                    | 0=mai; 1=poche ore; 2=1gg; 3=<1 settimana; 4=<1 mese; 5= 1-6 mesi; 6= 7-12 mesi;7=>1anno                   |
| Q32 | <b>17(f).Disagio nel team di lavoro (Uneasiness in working team)</b>                                                                                | 0=mai; 1=poche ore; 2=1gg; 3=<1 settimana; 4=<1 mese; 5= 1-6 mesi; 6= 7-12 mesi;7=>1anno                   |
| Q33 | <b>17(g).Vergogna, senso di colpa (Shame, sense of guilt)</b>                                                                                       | 0=mai; 1=poche ore; 2=1gg; 3=<1 settimana; 4=<1 mese; 5= 1-6 mesi; 6= 7-12 mesi;7=>1anno                   |
| Q34 | <b>17(h).Insonnia (Insomnia)</b>                                                                                                                    | 0=mai; 1=poche ore; 2=1gg; 3=<1 settimana; 4=<1 mese; 5= 1-6 mesi; 6= 7-12 mesi;7=>1anno                   |
| Q35 | <b>17(i). Stress (Stress)</b>                                                                                                                       | 0=mai; 1=poche ore; 2=1gg; 3=<1 settimana; 4=<1 mese; 5= 1-6 mesi; 6= 7-12 mesi;7=>1anno                   |
| Q36 | <b>17(j). Dubbi circa le proprie conoscenze e abilità (Doubts about own skills and knowledge)</b>                                                   |                                                                                                            |
| Q37 | <b>18.Hai pensato di abbandonare gli studi dopo questo PSI? (Have you ever considered quitting the study course after the PSI?)</b>                 | 1=no;2=sì                                                                                                  |
| Q38 | <b>19.Hai colto qualche elemento positivo in questa esperienza? (Did you identify any positive element from this experience?)</b>                   | 1=no;2=sì                                                                                                  |
| Q39 | <b>20.Potresti descrivere quale elemento positivo hai colto in questa esperienza? (Can you describe in detail any positive element identified?)</b> |                                                                                                            |
| Q40 | <b>21(a). Hai mai parlato con qualcuno di questo incidente?: Tutor clinico (Have you ever spoken to anyone about this incident? Clinical tutor)</b> | 1=sì, esperienza positiva;2=sì,esperienza negativa; 3=no ma mi dispiace; 4=no, ma è stata la scelta giusta |
| Q41 | <b>21(b). Tutor didattico (Didactic tutor)</b>                                                                                                      | 1=sì, esperienza positiva;2=sì,esperienza negativa; 3=no ma mi dispiace; 4=no, ma è stata la scelta giusta |
| Q42 | <b>21(c). Docente/Professore (Professor)</b>                                                                                                        | 1=sì, esperienza positiva;2=sì,esperienza negativa; 3=no ma mi dispiace; 4=no, ma è stata la scelta giusta |
| Q43 | <b>21(d). Counseling dell'Università (University counseling service)</b>                                                                            | 1=sì, esperienza positiva;2=sì,esperienza negativa; 3=no ma mi dispiace; 4=no, ma è stata la scelta giusta |
| Q44 | <b>21(e). Colleghi di università (University colleagues)</b>                                                                                        | 1=sì, esperienza positiva;2=sì,esperienza negativa; 3=no ma mi dispiace; 4=no, ma è stata la scelta giusta |
| Q45 | <b>21(f). Infermieri (Nurses)</b>                                                                                                                   | 1=sì, esperienza positiva;2=sì,esperienza negativa; 3=no ma mi dispiace; 4=no, ma è stata la scelta giusta |
| Q46 | <b>21(g). Coordinatore infermieristico (Head nurse)</b>                                                                                             | 1=sì, esperienza positiva;2=sì,esperienza negativa; 3=no ma mi dispiace; 4=no, ma è stata la scelta giusta |
| Q47 | <b>21(h). Medici (Physicians)</b>                                                                                                                   | 1=sì, esperienza positiva;2=sì,esperienza negativa; 3=no ma mi dispiace; 4=no, ma è stata la scelta giusta |
| Q48 | <b>21(i). Medico di famiglia (Family doctor)</b>                                                                                                    | 1=sì, esperienza positiva;2=sì,esperienza negativa; 3=no ma mi dispiace; 4=no, ma è stata la scelta giusta |
| Q49 | <b>21(j). Familiari (Relatives)</b>                                                                                                                 | 1=sì, esperienza positiva;2=sì,esperienza negativa; 3=no ma mi dispiace; 4=no, ma è stata la scelta giusta |

|     |                                                                                                                                                                                                                                                                                         |                                                                                                               |
|-----|-----------------------------------------------------------------------------------------------------------------------------------------------------------------------------------------------------------------------------------------------------------------------------------------|---------------------------------------------------------------------------------------------------------------|
| Q50 | <b>21(k). Amici (Friends)</b>                                                                                                                                                                                                                                                           | 1=sì, esperienza positiva;2=sì,esperienza negativa; 3=no ma mi dispiace;<br>4=no, ma è stata la scelta giusta |
| Q51 | <b>21(l). Partner (Partner)</b>                                                                                                                                                                                                                                                         | 1=sì, esperienza positiva;2=sì,esperienza negativa; 3=no ma mi dispiace;<br>4=no, ma è stata la scelta giusta |
| Q52 | <b>21(m). Paziente (Patient)</b>                                                                                                                                                                                                                                                        | 1=sì, esperienza positiva;2=sì,esperienza negativa; 3=no ma mi dispiace;<br>4=no, ma è stata la scelta giusta |
| Q53 | <b>21(n). Familiari del paziente (Patient relatives)</b>                                                                                                                                                                                                                                | 1=sì, esperienza positiva;2=sì,esperienza negativa; 3=no ma mi dispiace;<br>4=no, ma è stata la scelta giusta |
| Q54 | <b>22.Se ne hai parlato con il paziente e/o i suoi familiari, come hai affrontato questa conversazione?</b><br>(If you spoke to the patient and/or his/her relatives, how did you conduct such conversation?)                                                                           |                                                                                                               |
| Q55 | <b>23.Se ne hai parlato con il paziente e/o i suoi familiari, quale esperienza hai tratto da questa conversazione?</b><br>(If you spoke to the patient and/or his/her relatives, what lesson have you learned from this conversation?)                                                  |                                                                                                               |
| Q56 | <b>24(a). Se fossi mai coinvolto in un PSI nel futuro, con chi ne parleresti?: Tutor clinico</b><br>(If you were ever involved in a PSI in the future, who would you talk to about it? Clinical Tutor)                                                                                  | 1=sì; 2=no; 3=non so                                                                                          |
| Q57 | <b>24(b). Tutor didattico (Didactic tutor)</b>                                                                                                                                                                                                                                          | 1=sì; 2=no; 3=non so                                                                                          |
| Q58 | <b>24(c). Docente/Professore (Professor)</b>                                                                                                                                                                                                                                            | 1=sì; 2=no; 3=non so                                                                                          |
| Q59 | <b>24(d). Counseling dell'Università (University counseling service)</b>                                                                                                                                                                                                                | 1=sì; 2=no; 3=non so                                                                                          |
| Q60 | <b>24(e). Colleghi di università (University colleagues)</b>                                                                                                                                                                                                                            | 1=sì; 2=no; 3=non so                                                                                          |
| Q61 | <b>24(f). Infermieri (Nurses)</b>                                                                                                                                                                                                                                                       | 1=sì; 2=no; 3=non so                                                                                          |
| Q62 | <b>24(g). Coordinatore infermieristico (Head nurse)</b>                                                                                                                                                                                                                                 | 1=sì; 2=no; 3=non so                                                                                          |
| Q63 | <b>24(h). Medici (Physicians)</b>                                                                                                                                                                                                                                                       | 1=sì; 2=no; 3=non so                                                                                          |
| Q64 | <b>24(i). Medico di famiglia (Family doctor)</b>                                                                                                                                                                                                                                        | 1=sì; 2=no; 3=non so                                                                                          |
| Q65 | <b>24(j). Familiari (Relatives)</b>                                                                                                                                                                                                                                                     | 1=sì; 2=no; 3=non so                                                                                          |
| Q66 | <b>24(k). Amici (Friends)</b>                                                                                                                                                                                                                                                           | 1=sì; 2=no; 3=non so                                                                                          |
| Q67 | <b>24(l). Partner (Partner)</b>                                                                                                                                                                                                                                                         | 1=sì; 2=no; 3=non so                                                                                          |
| Q68 | <b>24(m). Paziente (Patient)</b>                                                                                                                                                                                                                                                        | 1=sì; 2=no; 3=non so                                                                                          |
| Q69 | <b>24(n). Familiari del paziente (Patient relatives)</b>                                                                                                                                                                                                                                | 1=sì; 2=no; 3=non so                                                                                          |
| Q70 | <b>25(a). Cosa faresti se un paziente e la sua famiglia volessero parlare con te dopo un PSI?: Vorrei scusarmi</b><br>(What would you do if a patient and their family wanted to talk to you after a PSI?: I would like to apologize)                                                   | 1=sì; 2=no; 3=non so                                                                                          |
| Q71 | <b>25(b). Ascolterei e spiegherei tutto nel modo migliore possibile</b><br>(I would listen and explain everything in the best possible way)                                                                                                                                             | 1=sì; 2=no; 3=non so                                                                                          |
| Q72 | <b>25(c). Ascolterei e spiegherei solo il minimo</b><br>(I would listen and explain with minimal details)                                                                                                                                                                               | 1=sì; 2=no; 3=non so                                                                                          |
| Q73 | <b>25(d).Sosterrei la discussione ma non aggiungerei nient'altro</b><br>(I would sustain the discussion but not adding any detail)                                                                                                                                                      | 1=sì; 2=no; 3=non so                                                                                          |
| Q74 | <b>25(e). Eviterei ogni dialogo</b><br>(I would avoid any conversation)                                                                                                                                                                                                                 | 1=sì; 2=no; 3=non so                                                                                          |
| Q75 | <b>26(a). Supponiamo che nel futuro tu fossi coinvolto in un PSI. Cosa faresti?: Porrei più attenzione ai dettagli del mio lavoro</b><br>(Let's assume that in the future you were involved in a PSI. What would you do?: I would like to pay more attention to the details of my work) | 1=sì; 2=no; 3=non so                                                                                          |
| Q76 | <b>26(b). Ne parlerei il meno possibile</b><br>(I would talk about it as little as possible)                                                                                                                                                                                            | 1=sì; 2=no; 3=non so                                                                                          |
| Q77 | <b>26(c).Cambierei il mio modo di lavoro al fine di non ripetere l'errore</b><br>(I would change my way of working in order not to repeat the mistake)                                                                                                                                  | 1=sì; 2=no; 3=non so                                                                                          |
| Q78 | <b>26(d). Starei lontano da pazienti e situazioni analoghe</b><br>(I would stay away from patients and similar situations)                                                                                                                                                              | 1=sì; 2=no; 3=non so                                                                                          |

|     |                                                                                                                                                       |                                          |
|-----|-------------------------------------------------------------------------------------------------------------------------------------------------------|------------------------------------------|
| Q79 | <b>26(e).</b> Chiederei ad un collega che cosa avrebbe fatto in un caso simile<br>(I would ask a colleague what he would have done in a similar case) | 1=sì; 2=no; 3=non so                     |
| Q80 | <b>26(f).</b> Chiederei se i pazienti sono soddisfatti del mio operato<br>(I would ask if the patients are satisfied with my work)                    | 1=sì; 2=no; 3=non so                     |
| Q81 | <b>27.</b> Quanto pensi sia probabile essere coinvolti in un PSI?<br>(How often do you think it is probable to be involved in a PSI?)                 | 1=mensilmente;2=1/anno; 3=<1/anno;4=rari |
| Q82 | <b>28.</b> Sai di altri tuoi colleghi che sono stati coinvolti in un PSI?<br>(Do you have any notice of colleagues involved in a PSI?)                |                                          |
| Q83 | <b>28(b).</b> Se sì, quanti? (If yes, how many?)                                                                                                      |                                          |
| Q84 | <b>29.</b> Ti sentiresti di dare qualche consiglio alla tua Università?<br>(Do you want to make any suggestion to your University?)                   |                                          |
| Q85 | <b>30.</b> Telefono (Phone number)                                                                                                                    |                                          |
| Q86 | <b>31.</b> E-mail                                                                                                                                     |                                          |
